# Supplementary material for: Fabrication of a new metal–organic framework for sensitive sensing of nitroaromatics and efficient dye adsorption
Source: Royal Society of Chemistry journal article supplement (doi:10.1039/c7ra11221a), 2017-01-01
Supplement: c7ra11221a1.pdf [file c7ra11221a1.pdf]

## Supporting Information

### Fabrication of a new metal-organic framework for sensitive sensing of nitroaromatics and efficient dye adsorption

Wei-Ping Wu<sup>a\*</sup>, Jian Wu<sup>b</sup>, Jian-Qiang Liu<sup>c\*</sup>, Manoj Trivedi<sup>d</sup> and Abhinav Kumar<sup>d\*</sup>

#### Sensing Method

The photoluminescence sensing were performed as follows: the photoluminescence properties of **1** were investigated in N,N-dimethylformamide (DMF)/H<sub>2</sub>O emulsions at room temperature using a RF-5301PC spectrofluorophotometer. The **1**@DMF/H<sub>2</sub>O emulsions were prepared by adding 5 mg of **1** powder into 3.00 mL of DMF and then ultrasonic agitation the mixture for 30 min before testing.

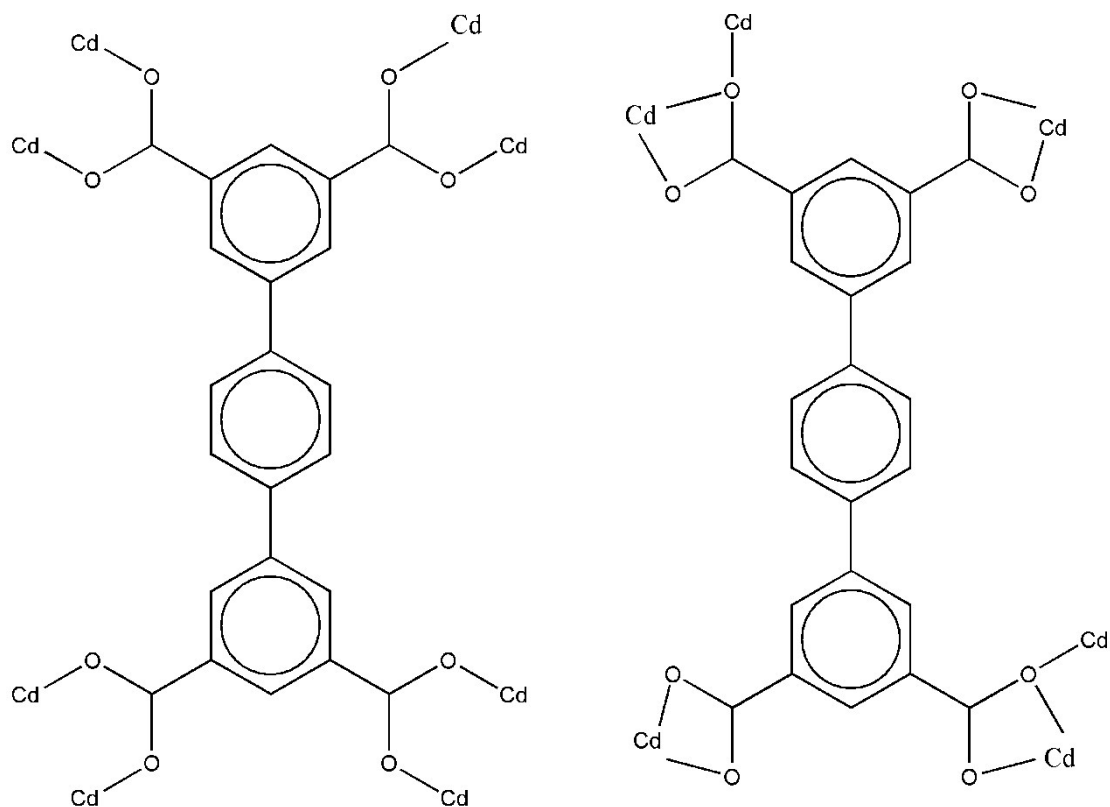

Scheme S1 view of the two coordination modes of H<sub>4</sub>L ligand in this work.

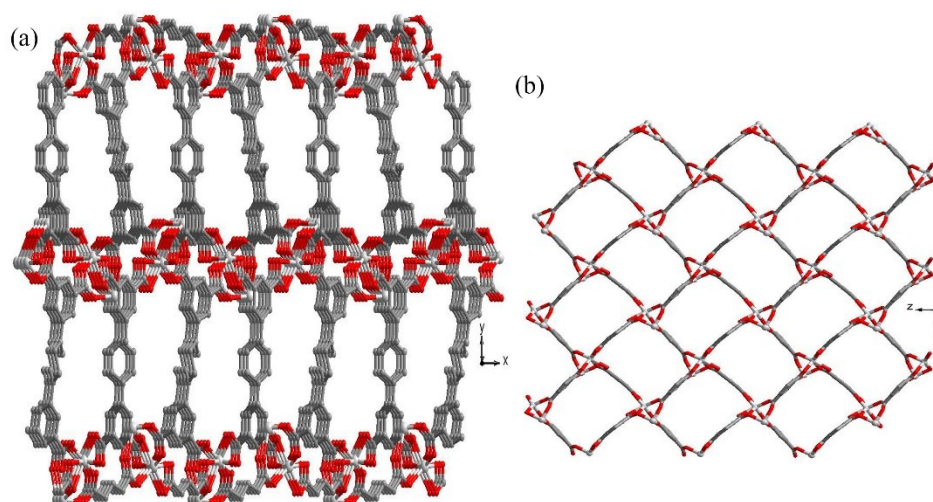

Fig. S1 view of the 3D network along the *ab*-plane.

Based upon the single crystal structure analysis, **1** has nano-sized pores. To reveal the thermal stability of these porous compounds, thermo-gravimetric experiments were carried out with pure single crystal samples under N<sub>2</sub> atmosphere conditions at a rate of 10 °C min<sup>-1</sup> over a range of 25–800 °C. In Fig. S2, the TGA curve of **1** shows two regions of weight loss. The first weight loss between 100 and 350 °C is about 28.6 %, which corresponds to the loss of three coordinated and a half free DMF molecules, calculated to be 28.1%. Above 350 °C, the compound decomposed gradually.

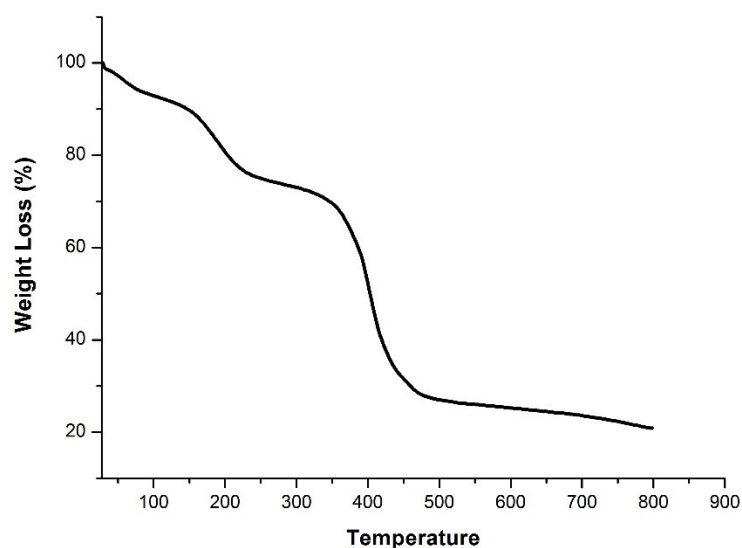

Fig. S2 view of TGA in **1**.

## Gas Sorption

The nitrogen adsorption-desorption measurements were carried out at liquid nitrogen temperature (77 K) by using an automatic volumetric adsorption equipment (Micromeritics, ASAP2020). Low pressure (< 800 torr) gas sorption isotherms were performed using a Micromeritics ASAP 2020 surface area and pore size analyzer. Pore size distribution data were obtained from the N<sub>2</sub> sorption isotherms based on the DFT model in the Micromeritics ASAP 2020 software package (assuming slit pore geometry). An ultra-high purity (UHP, 99.999% purity) grade of N<sub>2</sub> gas was used throughout the adsorption experiments. Prior to the measurements, all the samples were degassed at 80 °C for 10 h to remove the adsorbed impurities.

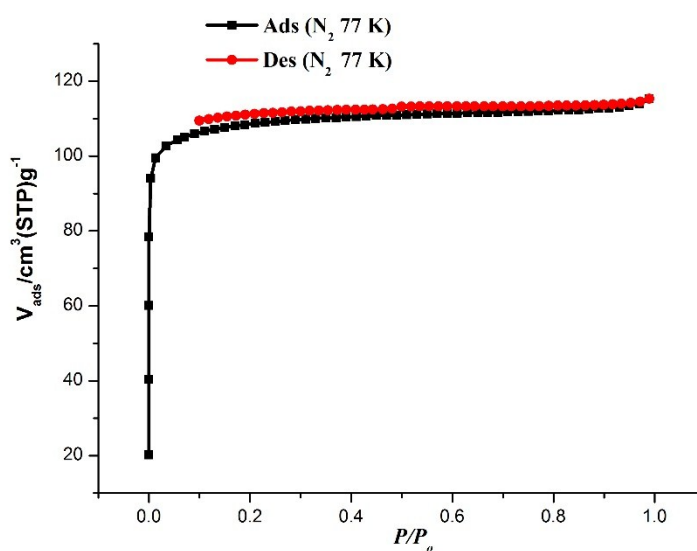

Fig. S3 view of the N<sub>2</sub> adsorption isotherms at 77 K.

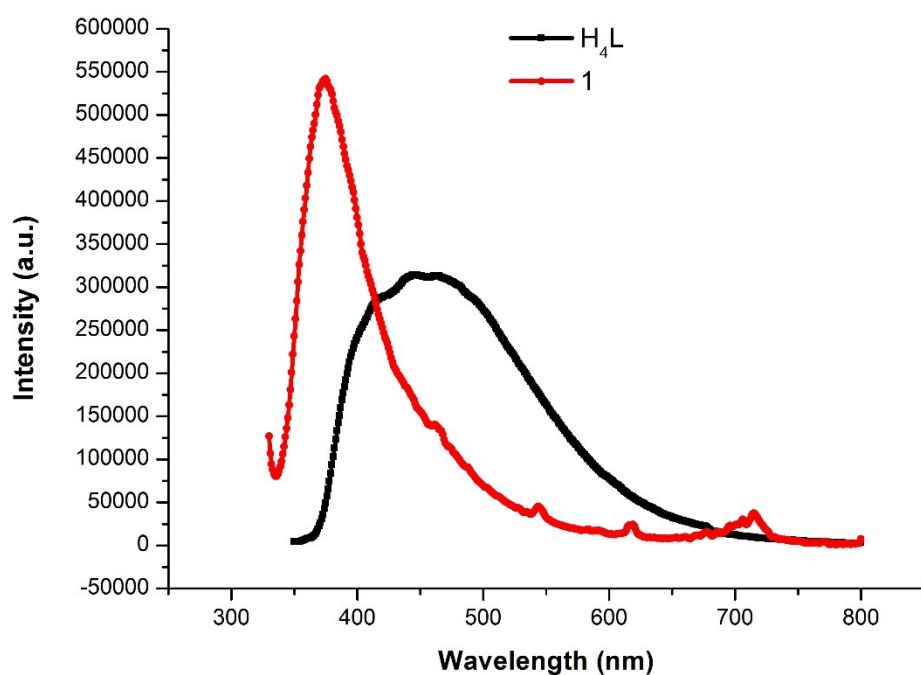

Fig. S4 view of the PL for solid state of **1** and H<sub>4</sub>L at room temperature.

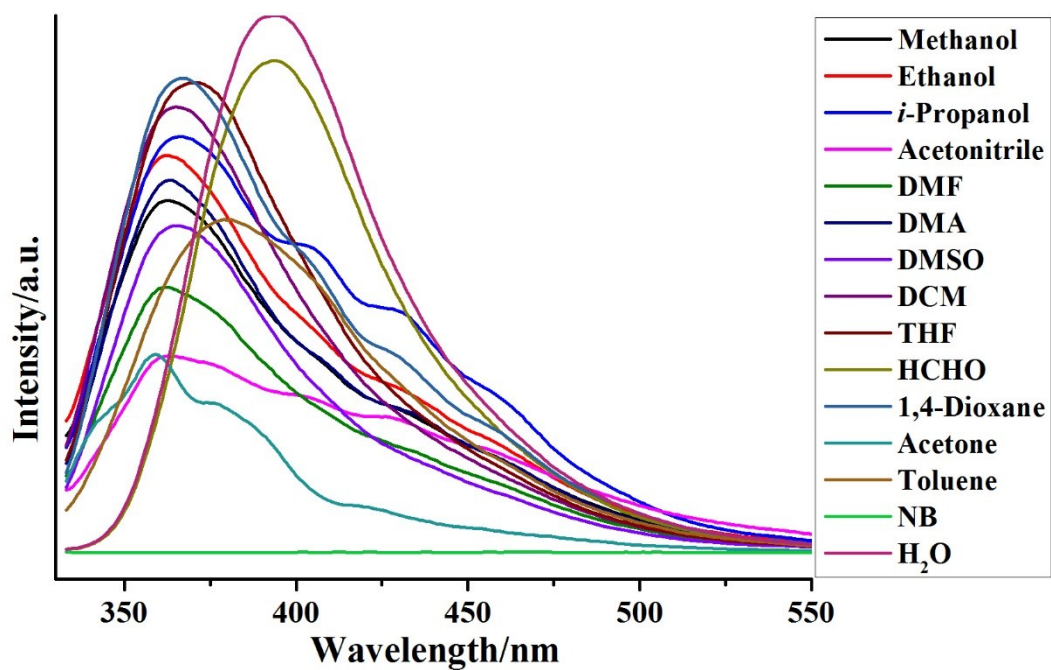

Fig. S5 Emission spectra of **1** at different solvents.

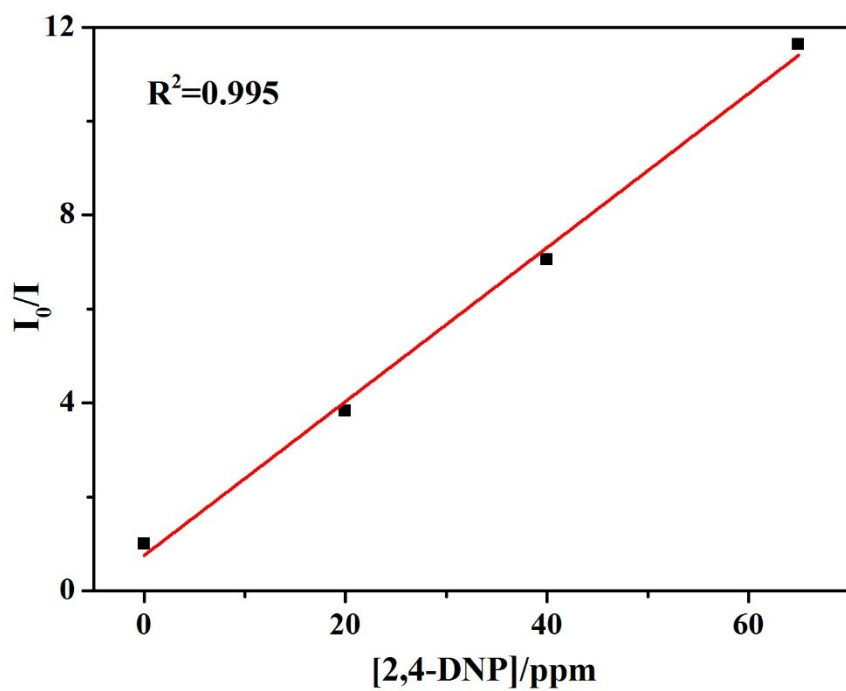

Fig. S6 Stern–Volmer plot for the fluorescence quenching of **1** upon the addition of 2,4-DNP.

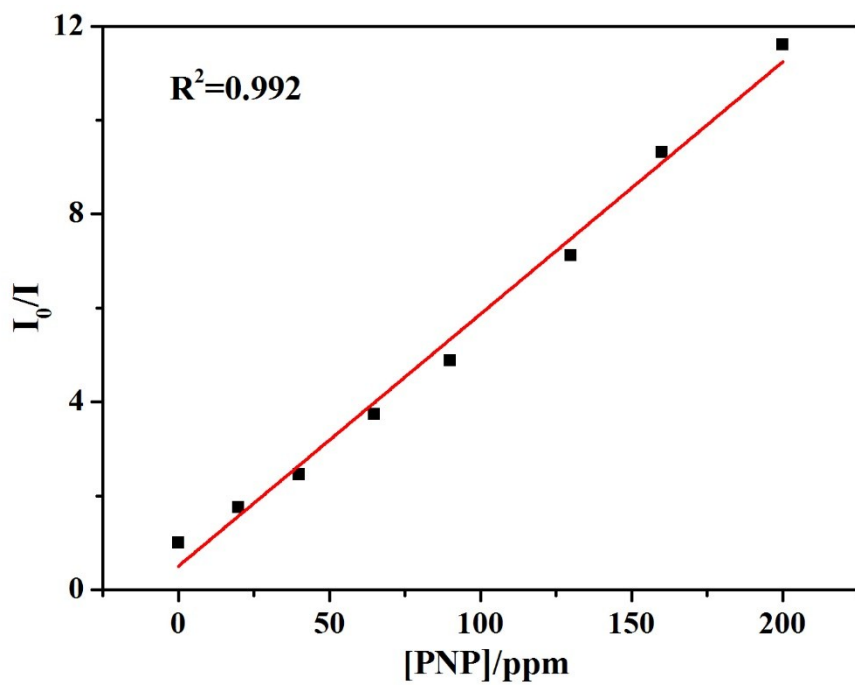

Fig. S7 Stern–Volmer plot for the fluorescence quenching of **1** upon the addition of PNP.

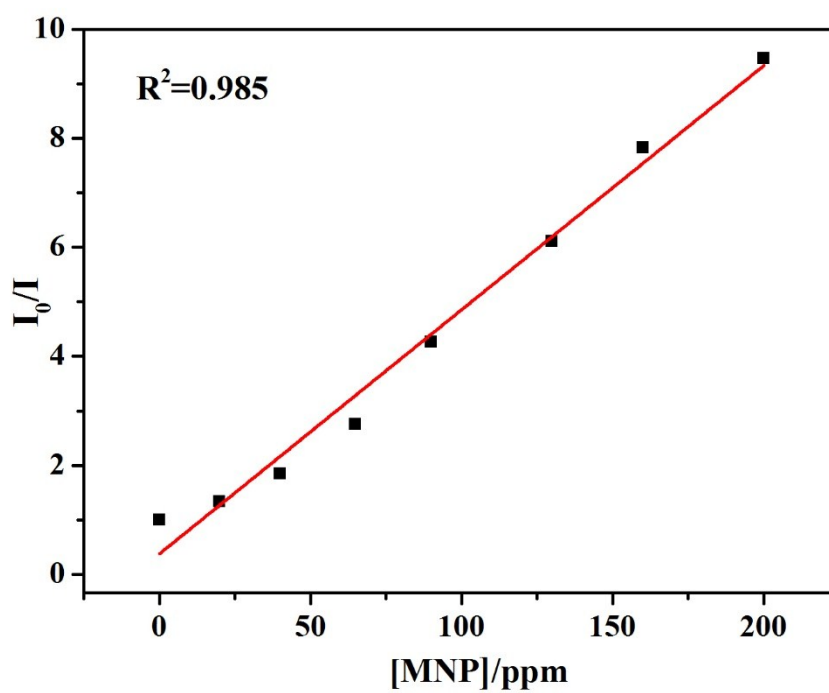

Fig. S8 Stern–Volmer plot for the fluorescence quenching of **1** upon the addition of MNP.

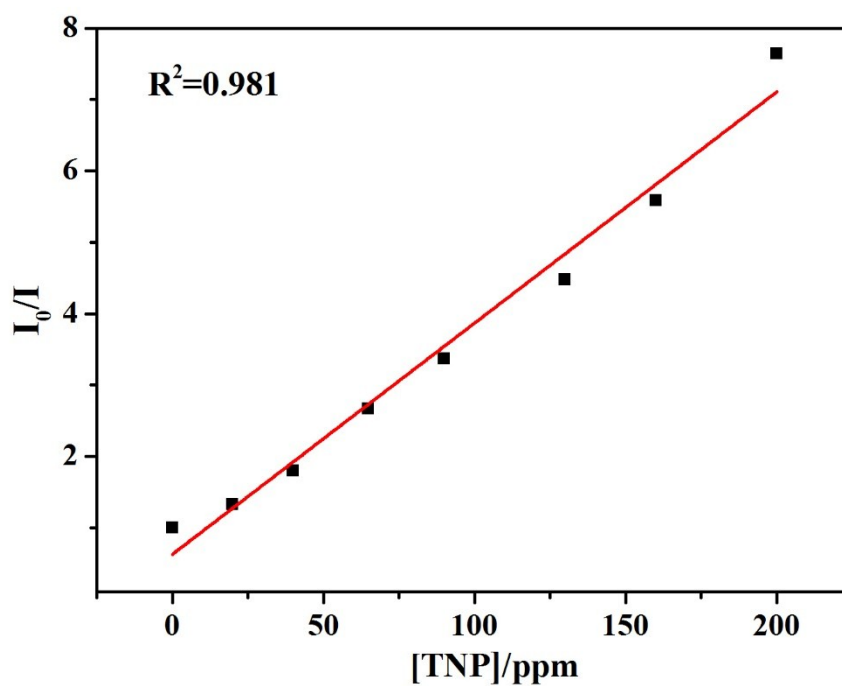

Fig. S9 Stern–Volmer plot for the fluorescence quenching of **1** upon the addition of TNP.

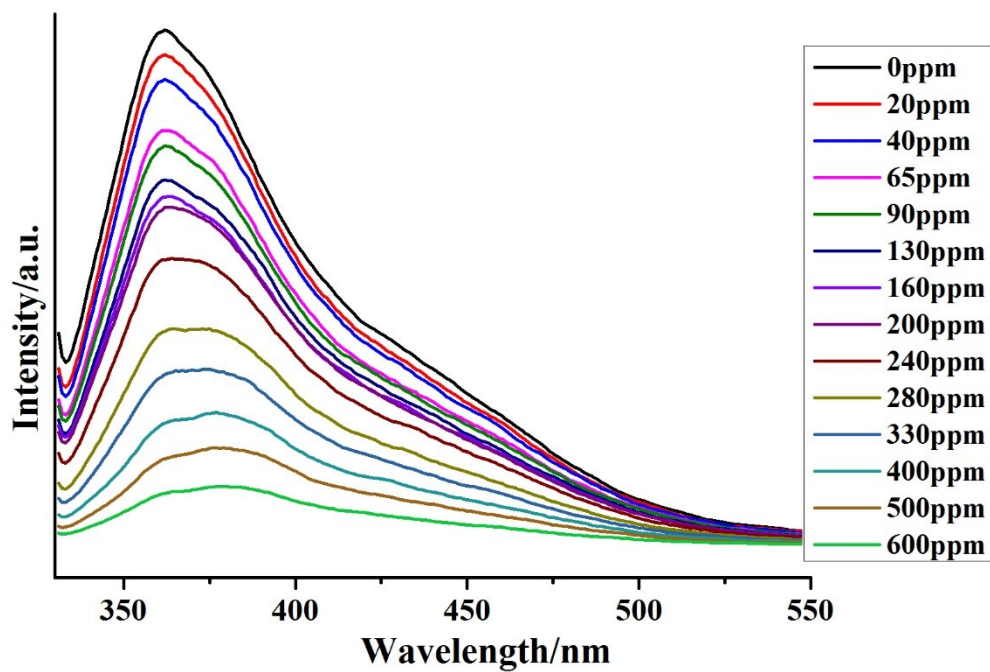

Fig. S10 Luminescent quenching of **1** dispersed in ethanol by the gradual addition of 1 mM solution of 1,3-DNB in DMF.

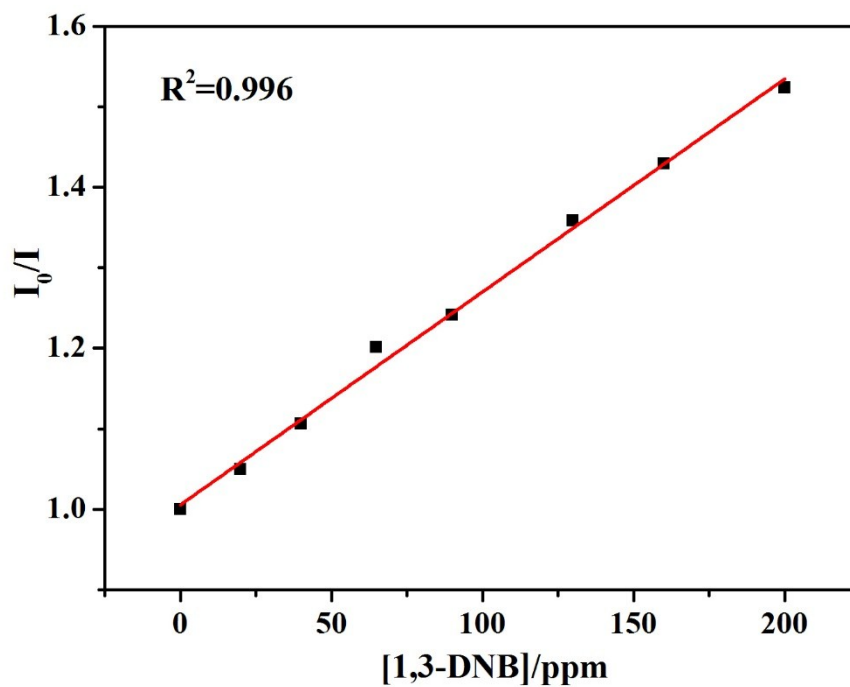

Fig. S11 Stern-Volmer plot for the fluorescence quenching of **1** upon the addition of 1,3-DNB.

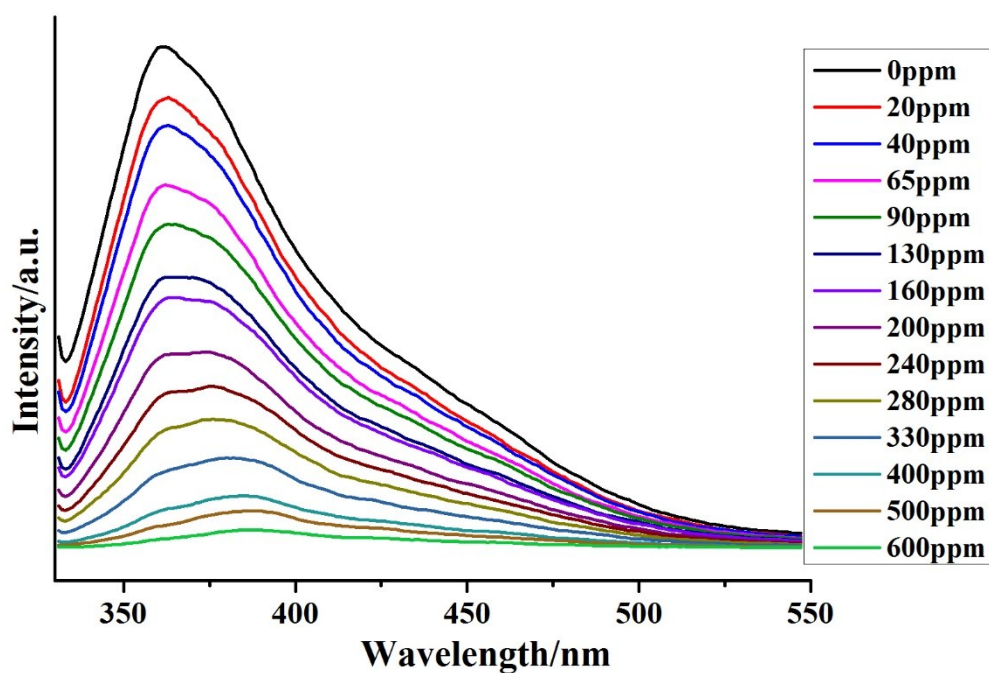

Fig. S12 Luminescent quenching of **1** dispersed in ethanol by the gradual addition of 1 mM solution of 2,4-DNT in DMF.

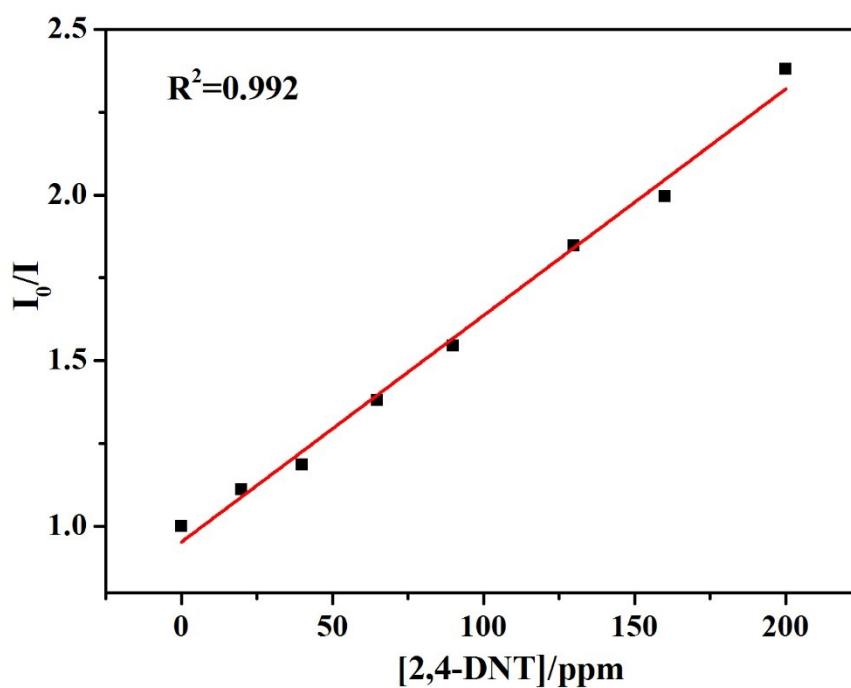

Fig. S13 Stern-Volmer plot for the fluorescence quenching of **1** upon the addition of 2,4-DNT.



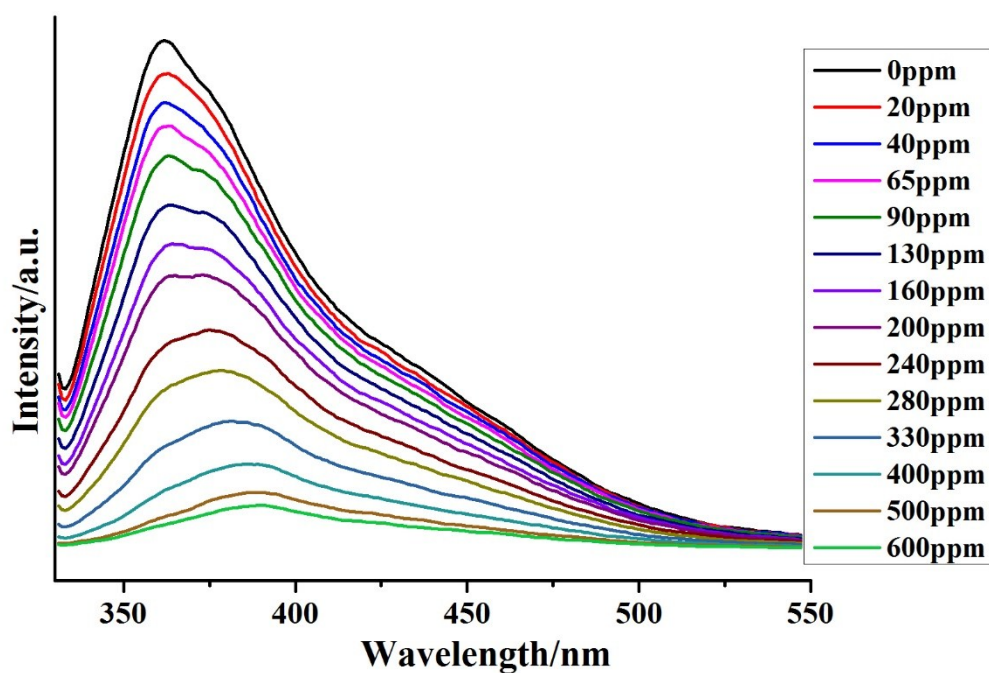

Fig. S14 Luminescent quenching of **1** dispersed in ethanol by the gradual addition of 1 mM solution of 2,6-DNT in DMF.

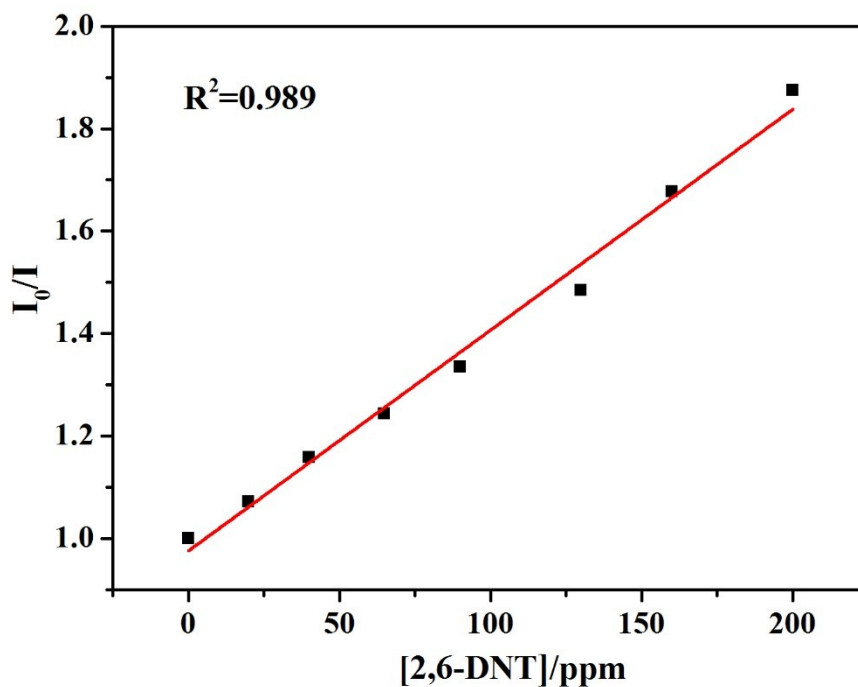

Fig. S15 Stern-Volmer plot for the fluorescence quenching of **1** upon the addition of 2,6-DNT.

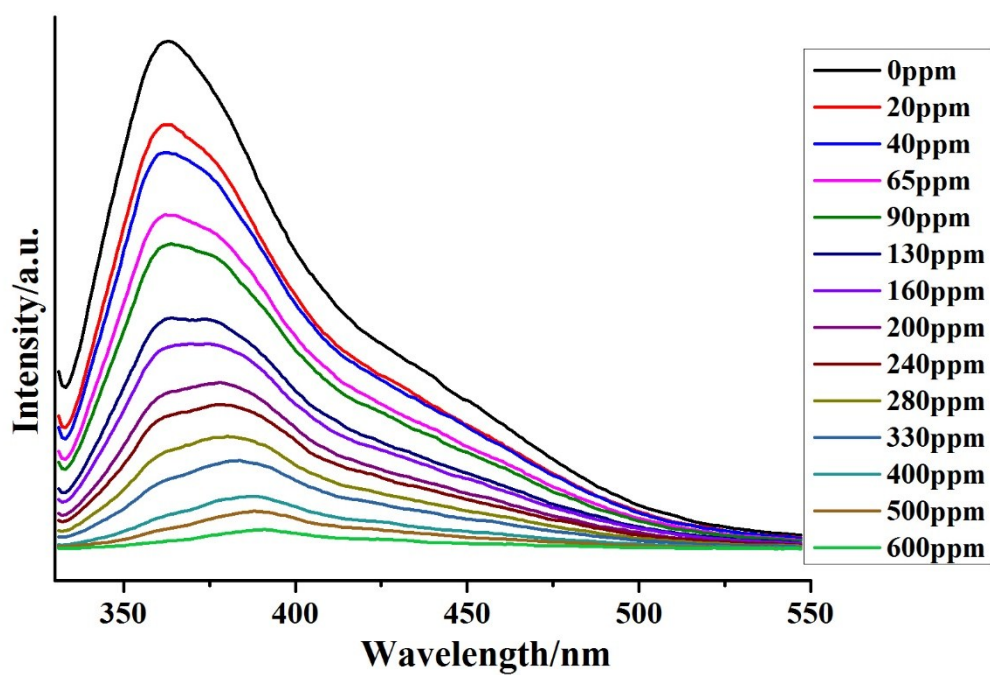

Fig. S16 Luminescent quenching of **1** dispersed in ethanol by the gradual addition of 1 mM solution of 2-NT in DMF.

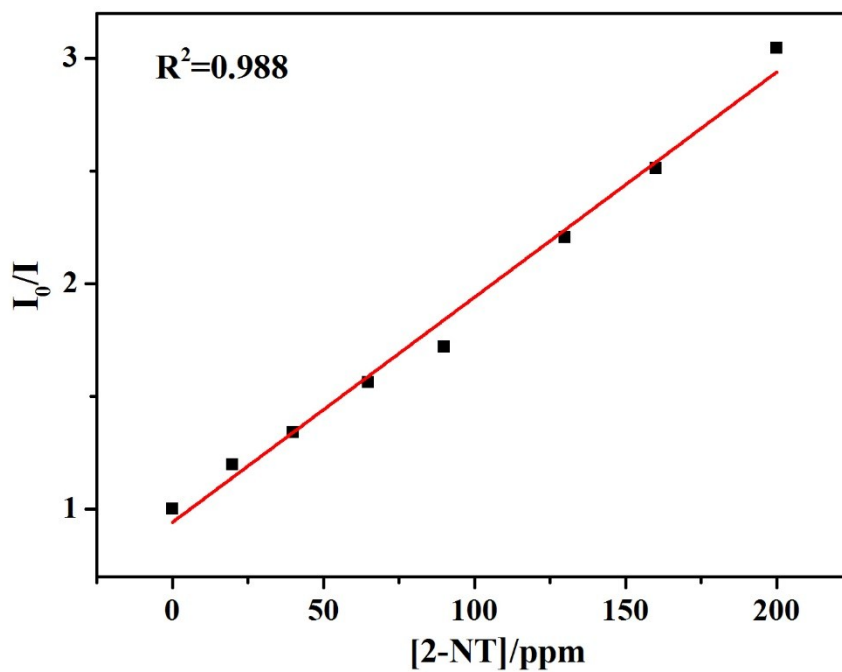

Fig. S17 Stern-Volmer plot for the fluorescence quenching of **1** upon the addition of 2-NT.

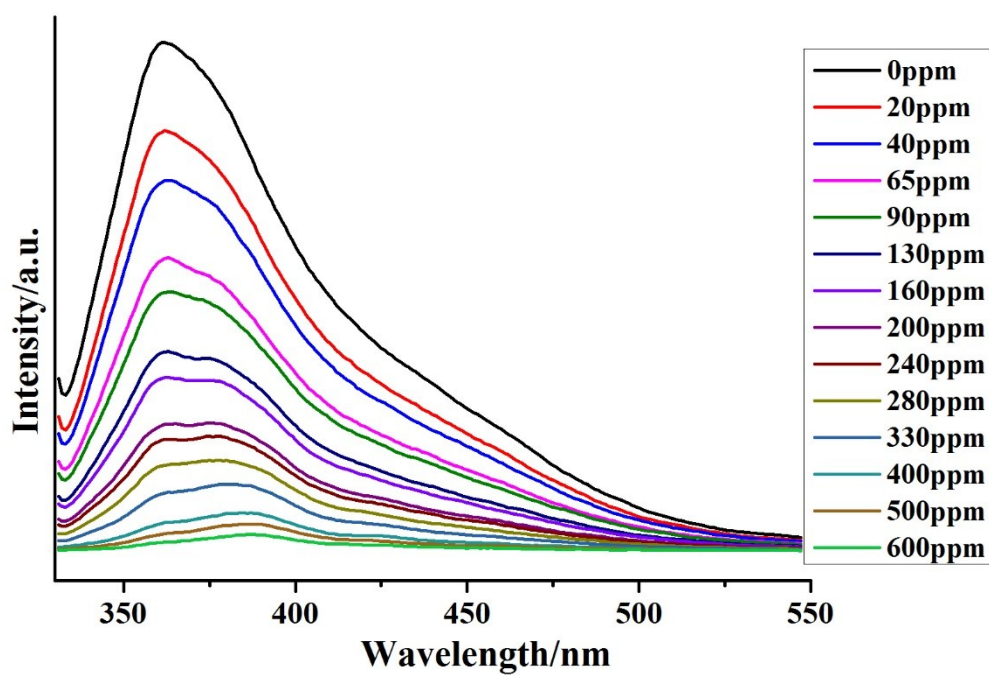

Fig. S18 Luminescent quenching of **1** dispersed in ethanol by the gradual addition of 1 mM solution of 4-NT in DMF.

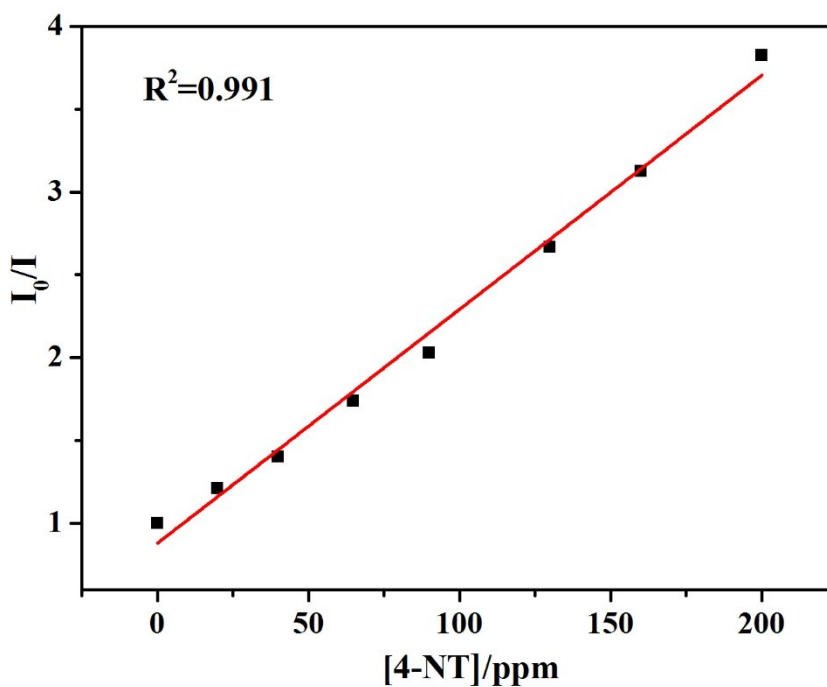

Fig. S19 Stern-Volmer plot for the fluorescence quenching of **1** upon the addition of 4-NT.

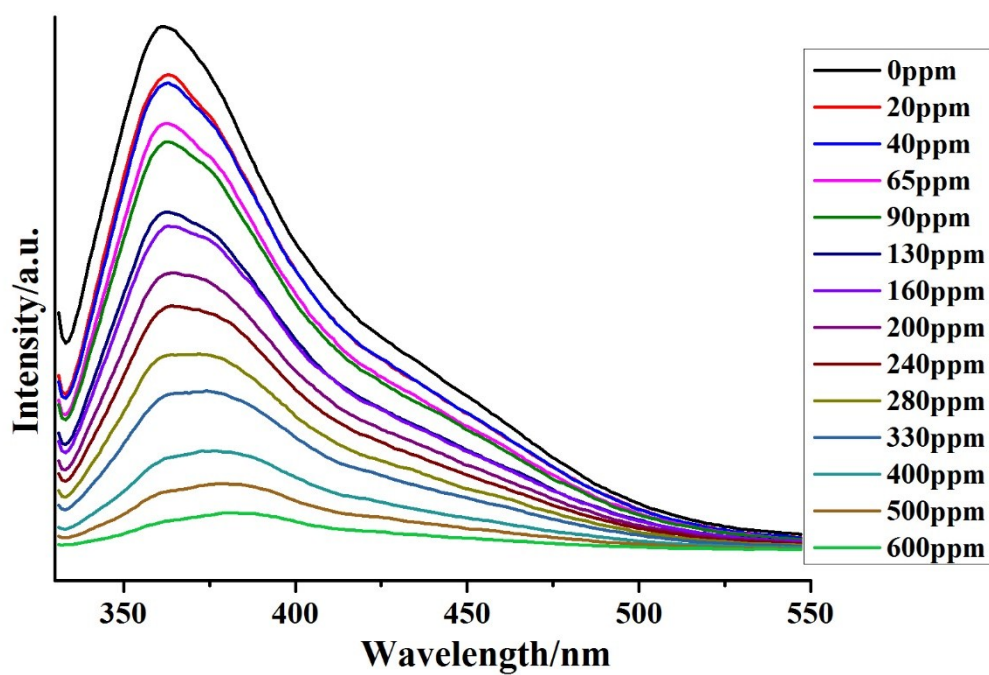

Fig. S20 Luminescent quenching of **1** dispersed in ethanol by the gradual addition of 1 mM solution of NB in DMF.

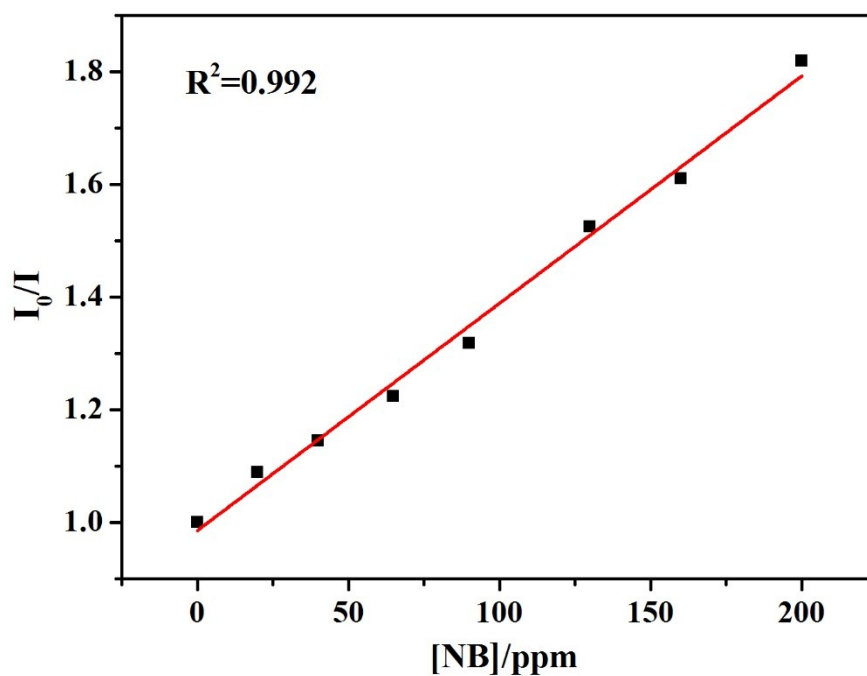

Fig. S21 Stern-Volmer plot for the fluorescence quenching of **1** upon the addition of NB.

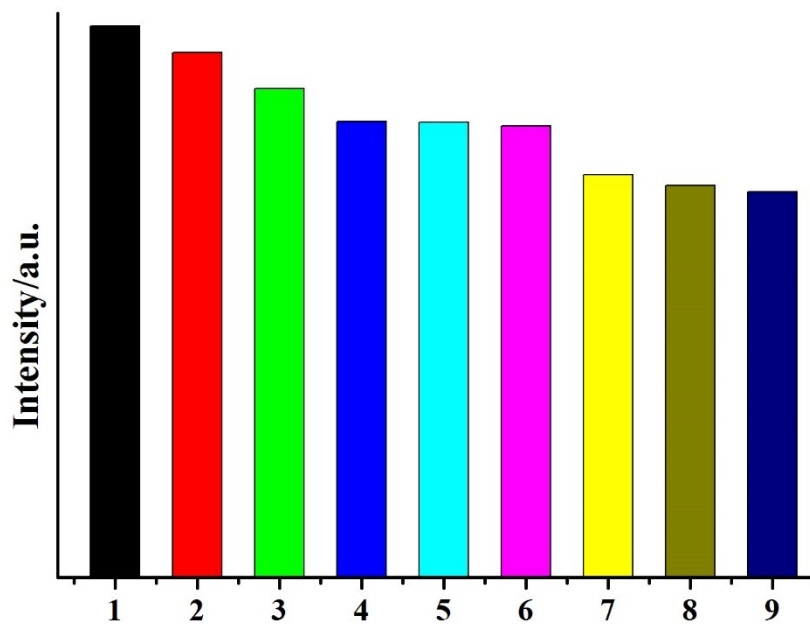

Fig. S22 Luminescent quenching of H<sub>4</sub>L dispersed in ethanol by the gradual addition of 1 mM solution of 2,4-DNP in DMF.

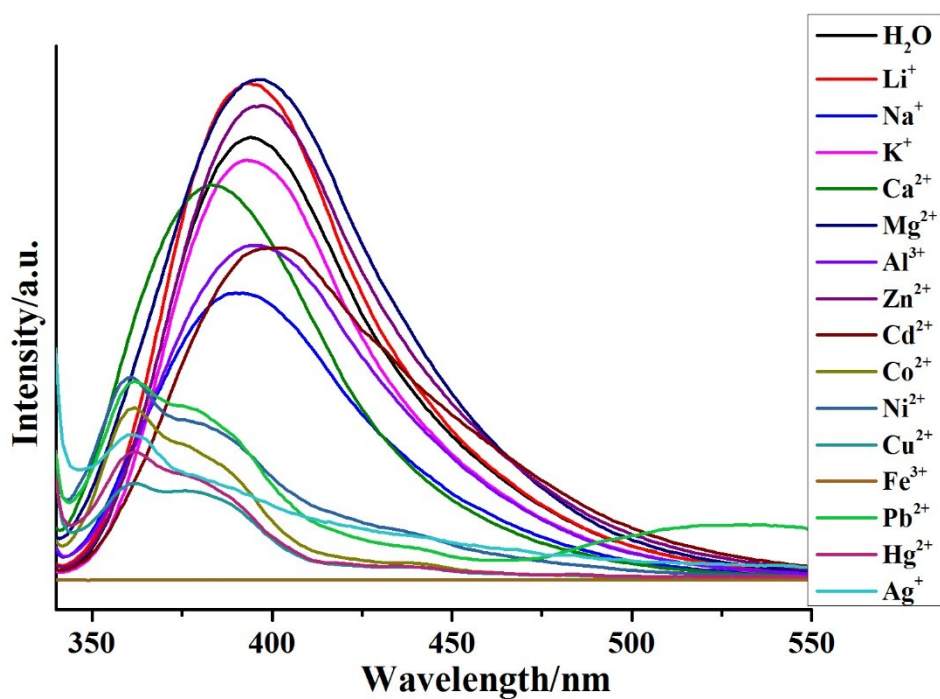

Fig. S23 Emission spectra of **1** at different metal ions.

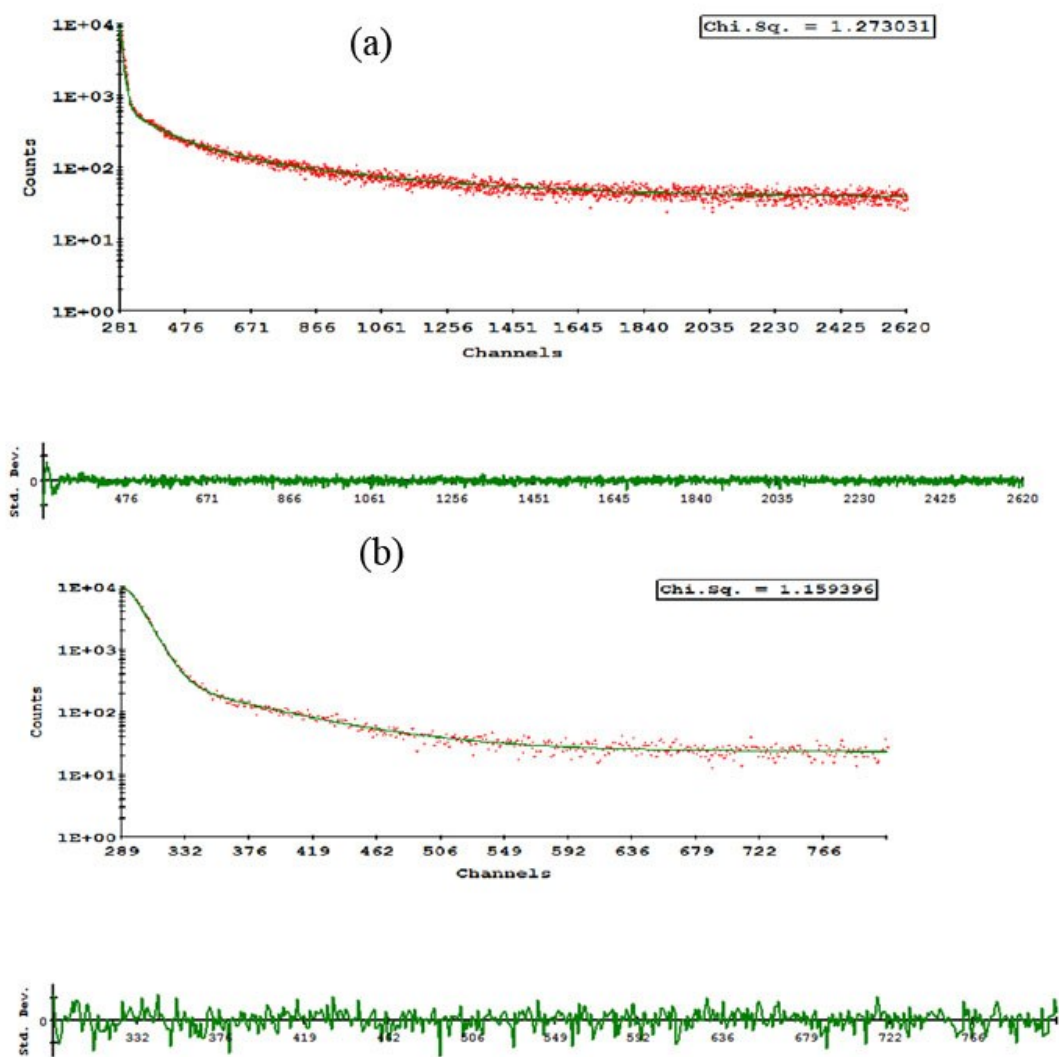

Fig. S24 Comparison of the fluorescence lifetime studies of original samples (a) and Fe<sup>3+</sup>-infused **1** in 10<sup>-2</sup> Fe(NO<sub>3</sub>)<sub>3</sub> DMF solution (b).

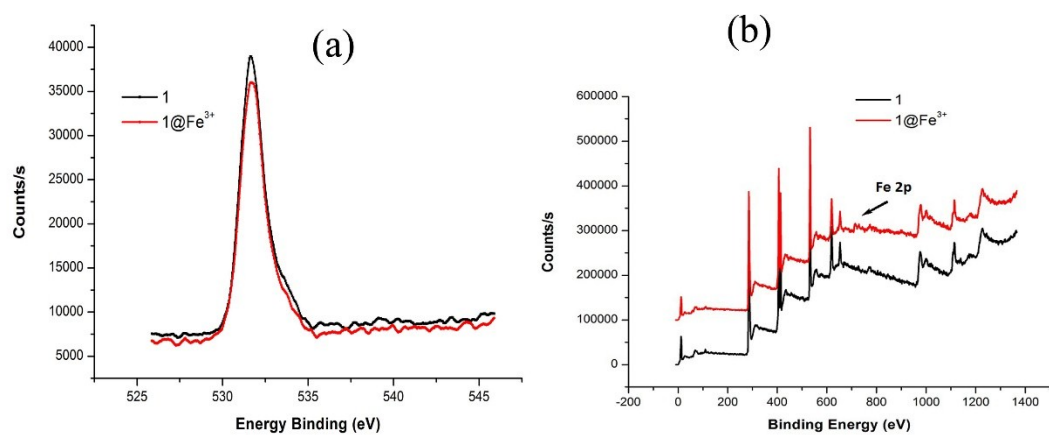

Fig. S25. (a) O 1s XPS spectra of the original **1** (black) and **1**@Fe<sup>3+</sup> (red); (b) XPS spectra of the **1**@Fe<sup>3+</sup> (red) and original **1** (black).

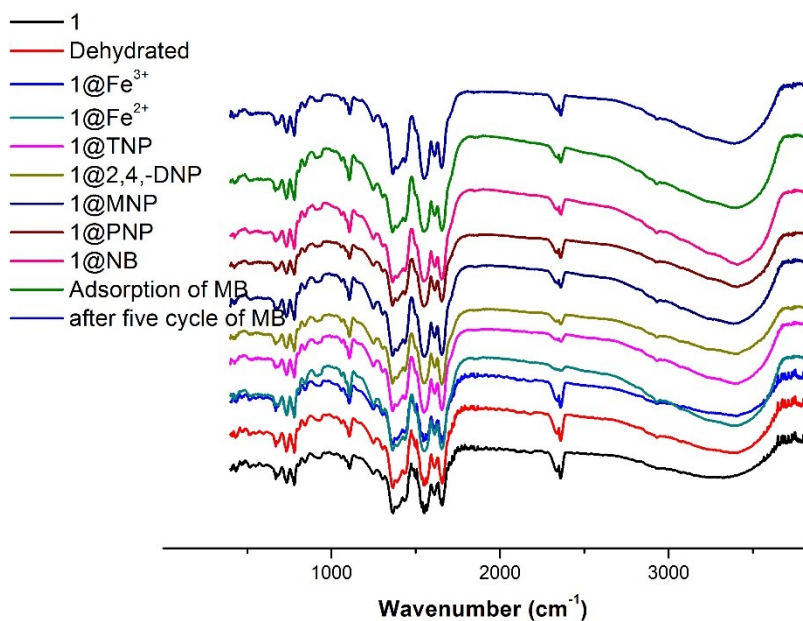

Fig. S26 view of the IR in different inclusions.

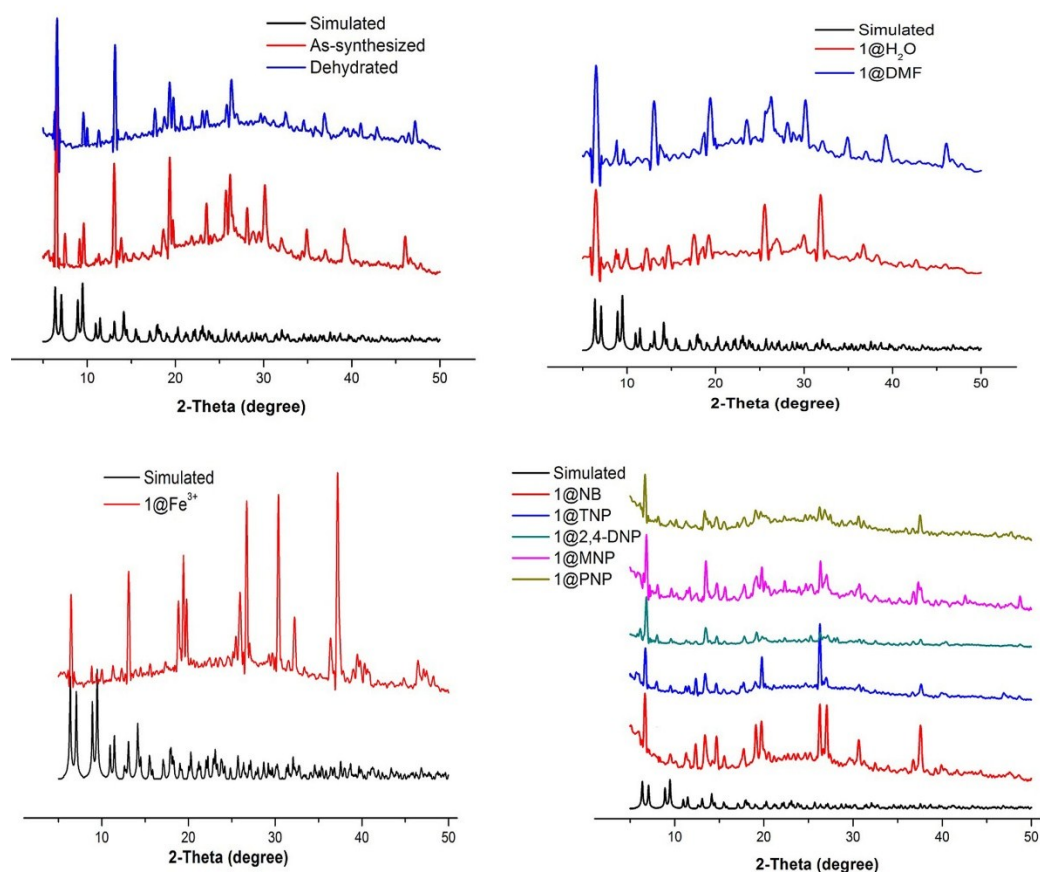

Fig. S27 (a) view of the PXRD for the sample **1** (black: simulated; red: as-synthesized; blue: dehydrated ones); (b) view of the PXRD pattern of **1** at DMF and H<sub>2</sub>O suspension; (c) view of the PXRD pattern of **1** at Fe<sup>3+</sup> suspension; (c) view of the PXRD pattern of **1** dispersed in different explosives.

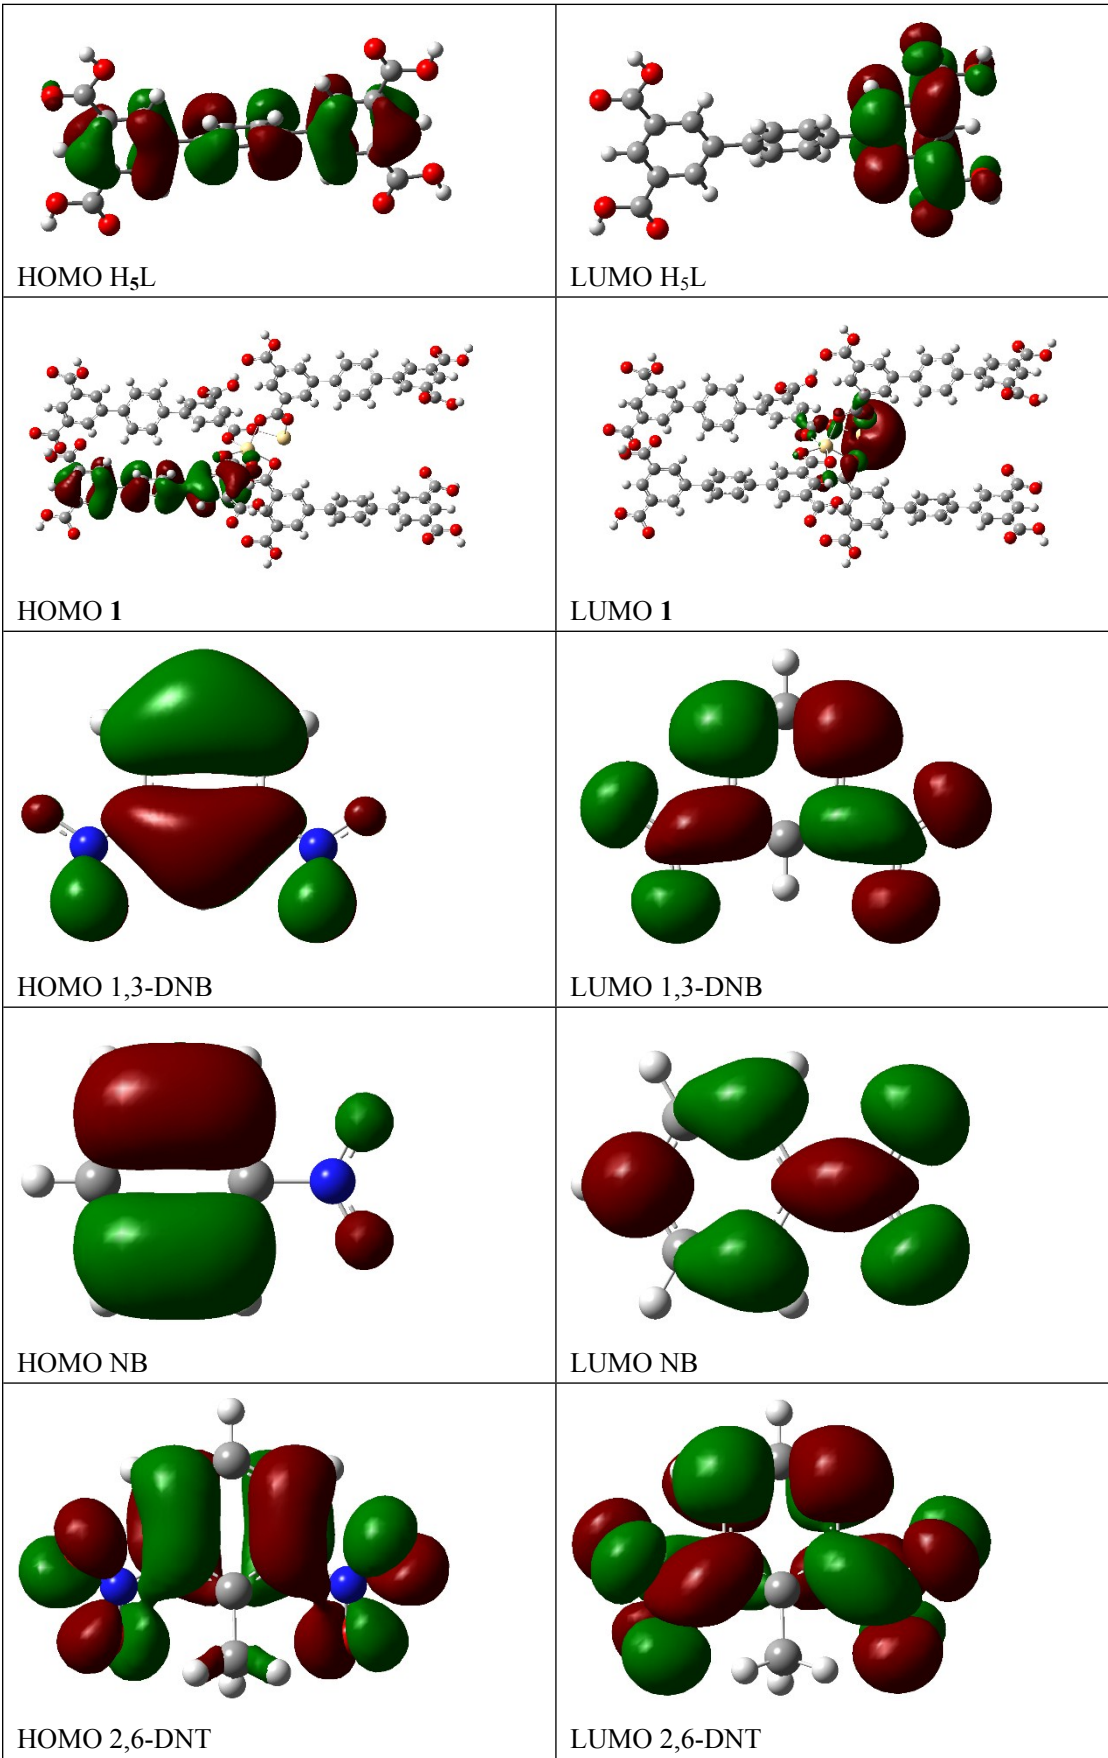



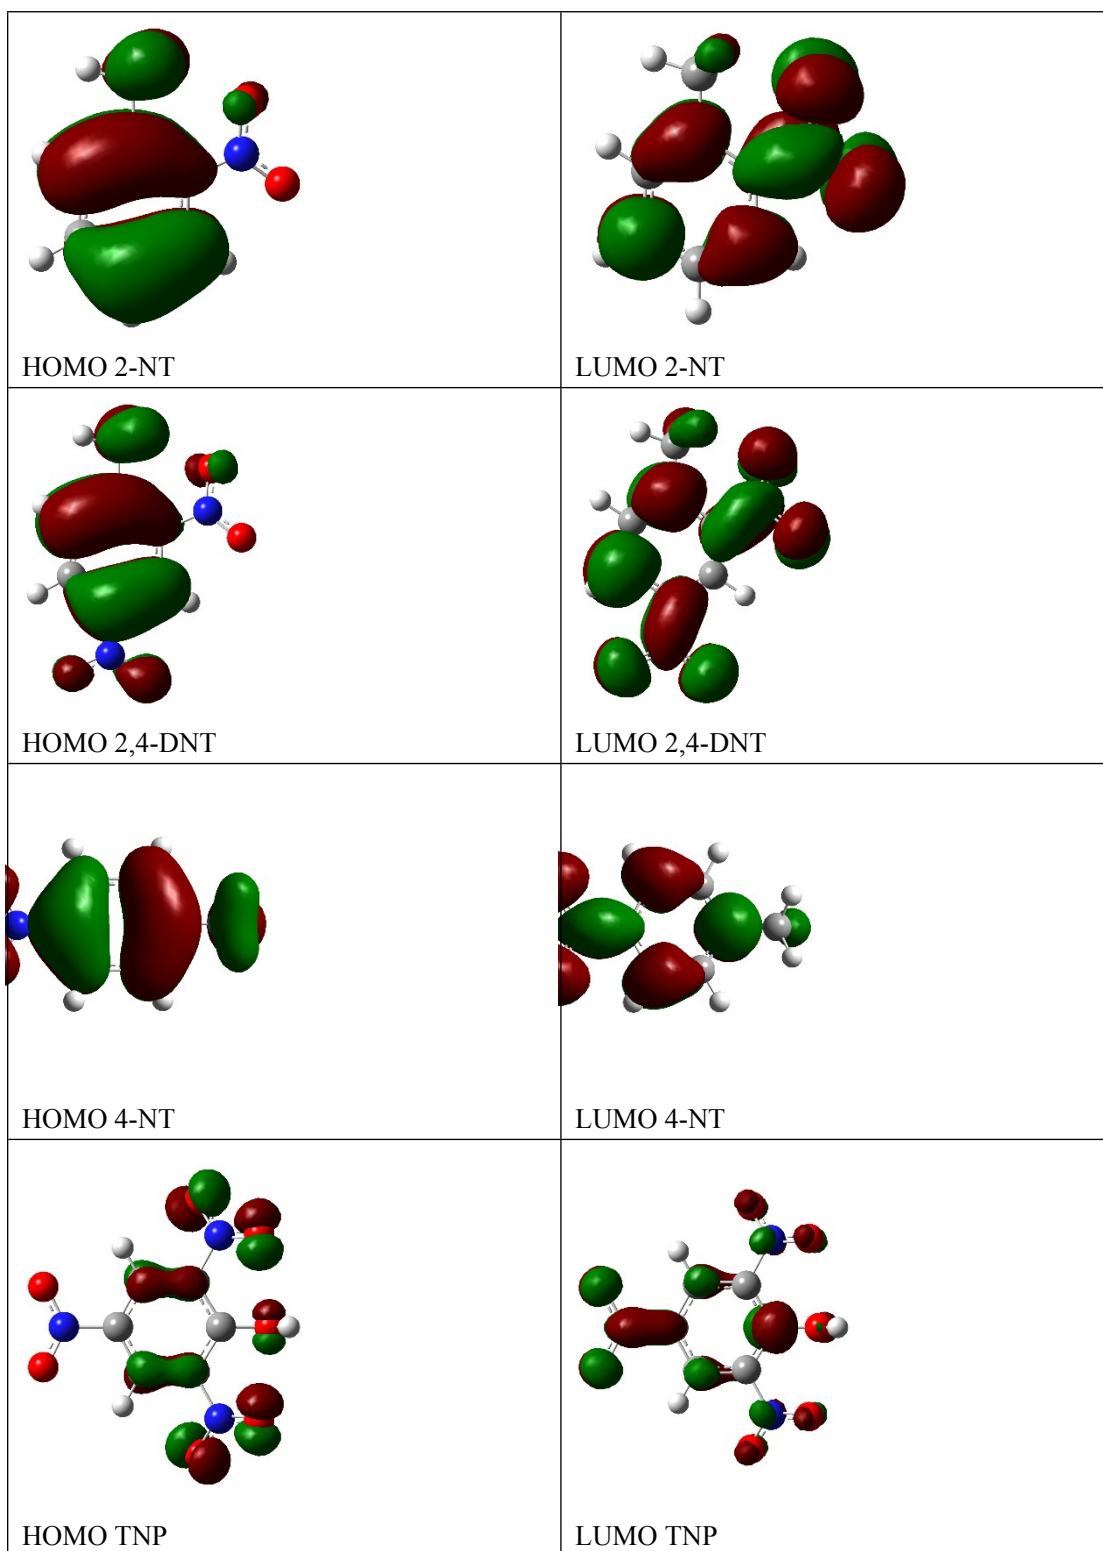

Fig. S28 HOMO-LUMO plots of H<sub>4</sub>L, **1** and NACs

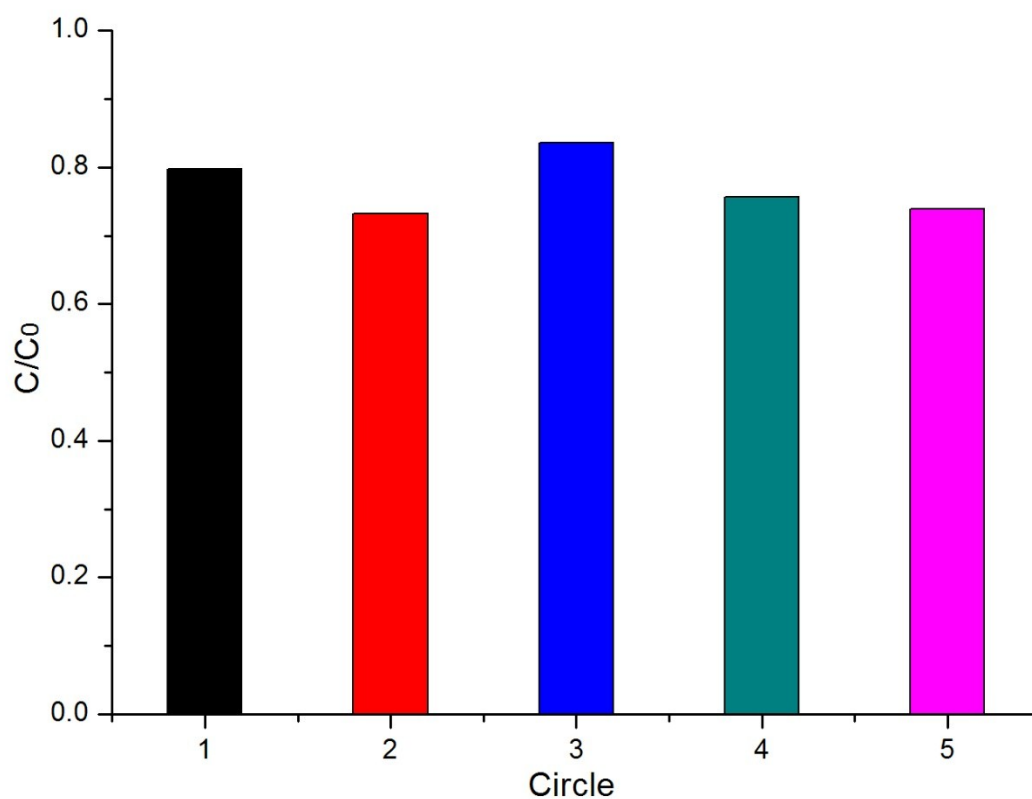

Fig. S29 view the cycle adsorption for the MB in **1**.

**Table S1. Crystallographic data and structure refinement details for 1**

|                                           |              |
|-------------------------------------------|--------------|
| Crystal system                            | Orthorhombic |
| Space group                               | $P2_12_12_1$ |
| Crystal color                             | colorless    |
| $a$ , Å                                   | 14.0179(19)  |
| $b$ , Å                                   | 27.727(4)    |
| $c$ , Å                                   | 14.0053(19)  |
| $\alpha$ , °                              | 90           |
| $\beta$ , °                               | 90           |
| $\gamma$ , °                              | 90           |
| $V$ , Å <sup>3</sup>                      | 5443.6(13)   |
| $Z$                                       | 2            |
| $\rho_{\text{calcd}}$ , g/cm <sup>3</sup> | 1.033        |
| $\mu$ , mm <sup>-1</sup>                  | 0.819        |
| $F(000)$                                  | 1688         |

|                                              |                |
|----------------------------------------------|----------------|
| $\theta$ Range, deg                          | 2.10-25.40     |
| Reflection collected                         | 60770          |
| Independent reflections ( $R_{\text{int}}$ ) | 0.0747         |
| Reflections with $I > 2\sigma(I)$            | 17117          |
| Number of parameters                         | 530            |
| $R_1, wR_2 (I > 2\sigma(I))^*$               | 0.0786, 0.1879 |
| $R_1, wR_2$ (all data)**                     | 0.1278, 0.2157 |

\*  $R = \sum(F_o - F_c) / \sum(F_o)$ , \*\*  $wR_2 = \{\sum[w(F_o^2 - F_c^2)^2] / \sum(F_o^2)^2\}^{1/2}$ .

**Table S2.** Selected bond distances (Å) and angles (deg) for **1**

| <b>1</b>         |           |                    |           |
|------------------|-----------|--------------------|-----------|
| Cd(1)-O(5)       | 2.198(10) | Cd(1)-O(7)         | 2.208(10) |
| Cd(1)-O(4)       | 2.284(10) | Cd(1)-O(1)         | 2.351(9)  |
| Cd(1)-O(3)       | 2.363(10) | Cd(1)-O(2)         | 2.453(9)  |
| Cd(2)-O(8)       | 2.224(10) | Cd(2)-O(6)         | 2.250(10) |
| Cd(2)-O(1)#1     | 2.312(11) |                    |           |
| <b>1</b>         |           |                    |           |
| O(1)-Cd(1)-O(4)  | 142.0(4)  | O(1)-Cd(1)-O(5)    | 106.2(4)  |
| O(2)-Zn(1)-O(7)  | 155.5(4)  | O(5)-Cd(1)-O(7)    | 97.2(5)   |
| O(8)-Cd(2)-O(9)  | 93.0(6)   | O(8)-Cd(2)-O(11)   | 174.6(6)  |
| O(6)-Cd(2)-O(10) | 173.9(5)  | O(2)-Cd(2)-O(8)    | 88.0(4)   |
|                  |           | O(7)#3-Zn(1)-O(11) | 176.8(6)  |
|                  |           | O(6)#5-Zn(2)-O(8)  | 103.4(5)  |

symmetry codes: #1 = -x, -y, z.

Table S3 Comparison of the selected materials in detective sensitivity for Fe<sup>3+</sup> ions

| Material                                                                                                                                                       | Sensitivity             | Reference           |
|----------------------------------------------------------------------------------------------------------------------------------------------------------------|-------------------------|---------------------|
| Eu(acac) <sub>3</sub> @Zn(L2) <sub>2</sub> (L2 =ditopic pyridyl)                                                                                               | 5×10 <sup>-3</sup> M    | 1                   |
| {[H <sub>2</sub> N(CH <sub>3</sub> ) <sub>2</sub> ]Eu(H <sub>4</sub> L)(H <sub>2</sub> O)} (H <sub>4</sub> L= tetrakis[4-(carboxyphenyl)oxamethyl]methane acid | 2×10 <sup>-4</sup> M    | 2                   |
| Eu(L) <sub>3</sub> (L= 4'-(4-carboxyphenyl)-2,2': 6',2''-terpyridine)                                                                                          | 10 <sup>-4</sup> M      | 3                   |
| [Eu(BTPCA)(H <sub>2</sub> O)]·2DMF·3H <sub>2</sub> O (H <sub>3</sub> BTPCA = 1,1',1''-(benzene-1,3,5-triyl)tripiperidine-4-carboxylic acid                     | 10 <sup>-5</sup> M      | 4                   |
| [Al(OH)(BDC).xsovl] (H <sub>2</sub> BDC= 1,4-benzenedicarboxylic acid)                                                                                         | 0.9×10 <sup>-6</sup> M  | 5                   |
| {[LnCd <sub>2</sub> (DTPA) <sub>2</sub> (H <sub>2</sub> O) <sub>4</sub> ]·4H <sub>2</sub> O                                                                    | 1.5×10 <sup>-5</sup> M  | 6                   |
| carbon nanoparticles (CNPs)                                                                                                                                    | 0.32×10 <sup>-6</sup> M | 7                   |
| Fluorescent Gold Nanoclusters                                                                                                                                  | 5.4×10 <sup>-6</sup> M  | 8                   |
| [Cd <sub>3</sub> (dpa)(DMF) <sub>2</sub> (H <sub>2</sub> O) <sub>3</sub> ]·DMF                                                                                 | 1.75×10 <sup>-4</sup> M | 9                   |
| Zn <sub>3</sub> L <sub>3</sub> (DMF) <sub>2</sub>                                                                                                              | 10 <sup>-5</sup> M      | 10                  |
| [[Eu <sub>2</sub> (MFDA) <sub>2</sub> (HCOO) <sub>2</sub> (H <sub>2</sub> O) <sub>6</sub> ]·H <sub>2</sub> O                                                   | 1.0×10 <sup>-4</sup> M  | 11                  |
| [Tb <sub>4</sub> (OH) <sub>4</sub> (DSOA) <sub>2</sub> (H <sub>2</sub> O) <sub>8</sub> ]·(H <sub>2</sub> O) <sub>8</sub>                                       | 10 <sup>-6</sup> M      | 12                  |
| <b>1</b>                                                                                                                                                       | 2.2×10 <sup>-5</sup> M  | <i>In this work</i> |

- [1] G. G. Hou, Y. Liu, Q. K. Liu, J. P. Ma and Y. B. Dong, *Chem. Commun.* 2011, **47**, 10731-10733.
- [2] S. Dang, E. Ma, Z.M. Sun and H. J. Zhang, *J. Mater. Chem.* 2012, **22**, 16920-16926.
- [3] M. Zheng, H. Q. Tan, Z. G. Xie, L. G. Zhang, X. B. Jing and Z. C. Sun, *ACS Appl. Mater. Interfaces*, 2013, **5**, 1078-1083.
- [4] Q. Tang, S. X. Liu, Y. W. Liu, J. Miao, S. J. Li, L. Zhang, Z. Shi and Z. P. Zheng, *Inorg. Chem.* 2013, **52**, 2799-2801.
- [5] C. X. Yang, H. B. Ren and X. P. Yan, *Anal. Chem.* 2013, **85**, 7441-7446.
- [6] Q. Liu, F. Wan, L. X. Qiu, Y. Q. Sun and Y. P. Chen, *RSC Adv.*, 2014, **4**, 27013-27021.
- [7] K. G. Qu, J. S. Wang, J. S. Ren and X. G. Qu, *Chem. Eur. J.* 2013, **19**, 7243-7249.
- [8] J.-A. A. Ho, H.-C. Chang and W.-T. Su, *Anal. Chem.* 2012, **84**, 3246-3253.
- [9] J. C. Jin, L. Y. Pang, G. P. Yang, L. Hou and Y. Y. Wang, *Dalton Trans.*, 2015, **44**, 17222–17228.
- [10] Z. C. Yu, F. Q. Wang, X. Y. Lin, C. M. Wang, Y. Y. Fu, X. J. Wang, Y. N. Zhao and G. D. Li, *J. Solid. State. Chem.*, 2015, **232**, 96-101.
- [11] X. H. Zhou, L. Li, H. H. Li, T. Yang and W. Huang, *Dalton Trans.*, 2013, **42**, 12403–12409.
- [12] X. Y. Dong, R. Wang, J. Z. Wang, S. Q. Zang and T. C. W. Mak, *J. Mater.*

*Chem. A*, 2015, **3**, 641–647.

### **Selective adsorption behavior for dyes**

Typically, 30 mg of adsorbent sample was immersed in 20 mL of aqueous dye solution containing  $5 \times 10^{-5}$  mol L<sup>-1</sup> of dye at room temperature; the adsorption system was continually stirred.

### **Parameter meaning**

$Q_{eq}$  (mg g<sup>-1</sup>) is the amount of adsorbed MB by **1**,  $C_0$  (mg L<sup>-1</sup>) is the initial concentration of MB in the water, and  $C_{eq}$  (mg L<sup>-1</sup>) is the final concentration of MB remaining in the water.  $V$  (L) is the volume of MB solution and  $m$  (g) is the weight of **1** in this adsorption experiment.

where  $q_e$  and  $q_t$  (mg g<sup>-1</sup>) are the amounts of dye adsorbed at equilibrium and  $t$  (time), respectively, and  $K_1$  (min<sup>-1</sup>) is the rate constant.

where  $K_2$  (g mg<sup>-1</sup> min<sup>-1</sup>) is the pseudo-second-order rate constant.

where  $K_3$  (g mg<sup>-1</sup> min<sup>-1</sup>) is the second-order rate constant.

where  $K_4$  (mg g<sup>-1</sup> min<sup>-1/2</sup>) is the intraparticle diffusion rate constant and  $C$  is the boundary layer thickness.
